# Supplementary material
Source: Springer Nature journal article supplement (https://www.springermedizin.de/resource/supplementary/12986_2008_158_MOESM1_ESM.pdf/25655488)
Supplement: MOESM1 [file 25655488]

# Rat Body Weights

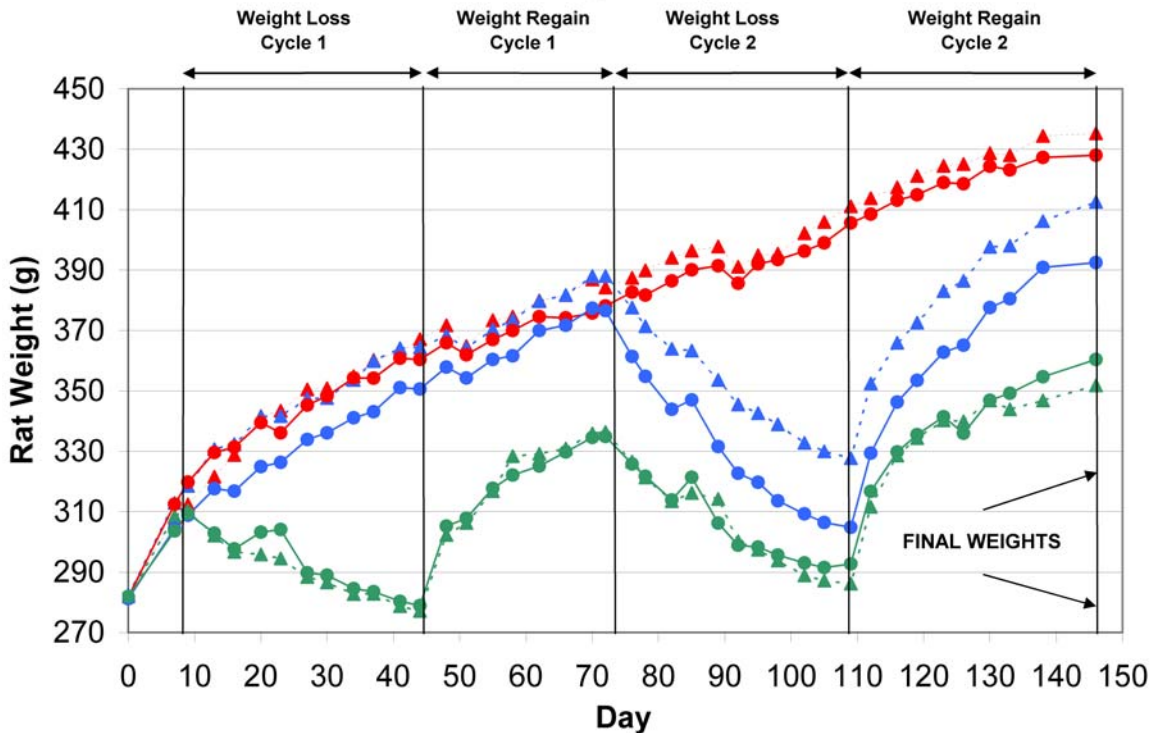

- ▲ ND0 = Normal Diet Fed Ad Lib
- ▲ ND1 = Normal Diet with 1 Weight Loss/Regain Cycle
- ▲ ND2 = Normal Diet with 2 Weight Loss/Regain Cycles
- RSD0 = Resistant Starch Diet Fed Ad Lib
- RSD1 = Resistant Starch Diet with 1 Weight Loss/Regain Cycle
- RSD2 = Resistant Starch Diet with 2 Weight Loss/Regain Cycles
